# Supplementary material for: 3D cell printing of islet-laden pancreatic tissue-derived extracellular matrix bioink constructs for enhancing pancreatic functions
Source: Royal Society of Chemistry journal article supplement (doi:10.1039/c8tb02787k), 2019-01-01
Supplement: c8tb02787k1.pdf [file c8tb02787k1.pdf]

## Supplementary Information

### 3D Cell Printing of Islet-laden Pancreatic Tissue-derived Extracellular Matrix Bioink Constructs for Enhancing Pancreatic Functions

Jaewook Kim <sup>a, 1</sup>, In Kyoung Shim <sup>b, 1</sup>, Dong Gyu Hwang <sup>c</sup>, Yu Na Lee <sup>b</sup>, Myungji Kim <sup>c</sup>, Hyeonji Kim <sup>a</sup>, Seok-Won Kim <sup>a</sup>, Song Lee <sup>b</sup>, Song Cheol Kim <sup>b, d, 2</sup>, Dong-Woo Cho <sup>a, 2</sup>, and Jinah Jang <sup>c, e, 2</sup>

<sup>a</sup> Department of Mechanical Engineering, Pohang University of Science and Technology (POSTECH), Pohang, Korea, <sup>b</sup> Asan Institute for Life Science, University of Ulsan College of Medicine and Asan Medical Center, Seoul, Korea, <sup>c</sup> School of Interdisciplinary Bioscience and Bioengineering, POSTECH, Korea <sup>d</sup> Division of Hepato-Biliary and Pancreatic Surgery, Department of Surgery, University of Ulsan College of Medicine and Asan Medical Center, Seoul, Korea, <sup>e</sup> Department of Creative IT Engineering, POSTECH, Pohang, Korea

<sup>1</sup> Both authors were contributed equally to this work.

<sup>2</sup>Correspondences to Profs. Jinah Jang ([jinahjang@postech.ac.kr](mailto:jinahjang@postech.ac.kr)); Dong-Woo Cho ([dwcho@postech.ac.kr](mailto:dwcho@postech.ac.kr)); Song Cheol Kim ([drksc@amc.ac.kr](mailto:drksc@amc.ac.kr))

## 1. Islet viability assay

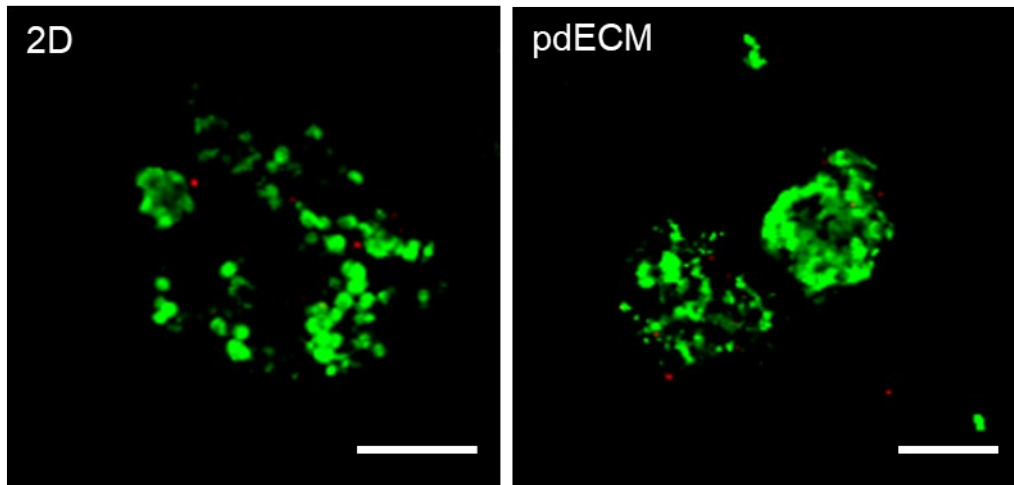

**Fig. S1** Qualitative analysis of islet viability after 1 days culture in 2D condition and pdECM bioink condition . (Scale bar: 100  $\mu\text{m}$ )

The confocal images show that both pdECM and 2D islet culture presented relatively high viability on day 1 compared to day 5, which means the cells did not die during handling or printing of the islets. It is expected that islets typically die in vitro as the culture continues over time.

Since the pancreatic islets are not proliferating cells in in vitro conditions<sup>1</sup>, the viability of each islet may be relatively low at day 5. What we are focusing on in this figure is that the islet survival rate of each experimental condition is virtually the same. Therefore, it can be noted that there is no islet survival-related problem when using pdECM bioink compared to the 2D conventional culture.

## Reference

1. T. C. Brelje, D. W. Scharp, P. E. Lacy, L. Ogren, F. Talamantes, M. Robertson, H. G. Friesen and R. L. Sorenson, *Endocrinology*, 1993, **132**, 879-887.
